# Supplementary material
Source: ML conference proceedings conference paper supplement (https://proceedings.mlr.press/v80/ghods18a.html)
Supplement: Supplementary file [file ghods18a-supp.pdf]

---

## Supplementary Material: Linear Spectral Estimators and an Application to Phase Retrieval

---

Ramina Ghods<sup>1</sup> Andrew S. Lan<sup>2</sup> Tom Goldstein<sup>3</sup> Christoph Studer<sup>1</sup>

### Abstract

This document includes additional proofs for the estimation error of spectral initializers, discusses the real-valued LSPE, and provides detailed derivations for each of the proposed LSPE.

### D. Proof of Proposition 1

Our goal is to first evaluate the S-MSE of the unnormalized spectral initializer in (2)

$$US-MSE_{SI} = \mathbb{E} \left[ \left\| \beta \sum_{m=1}^M \mathcal{T}(y_m) \mathbf{a}_m \mathbf{a}_m^H - \mathbf{xx}^H \right\|_F^2 \right]$$

and then minimize the resulting expression over the parameter  $\beta$ . The unnormalized spectral MSE can be expanded into the following form:

$$\begin{aligned} & |\beta|^2 \sum_{m=1}^M \sum_{m'=1}^M \mathbb{E}[\mathcal{T}(y_m) \mathcal{T}(y_{m'})] \text{tr}(\mathbf{a}_m \mathbf{a}_m^H \mathbf{a}_{m'} \mathbf{a}_{m'}^H) \\ & - \beta^* \sum_{m=1}^M \text{tr}(\mathbf{a}_m \mathbf{a}_m^H \mathbb{E}[\mathcal{T}(y_m) \mathbf{xx}^H]) \\ & - \beta \sum_{m=1}^M \text{tr}(\mathbb{E}[\mathbf{xx}^H \mathcal{T}(y_m)] \mathbf{a}_m \mathbf{a}_m^H) \\ & + \mathbb{E}[\|\mathbf{xx}^H\|_F^2]. \end{aligned}$$

By using the definitions

$$\begin{aligned} \tilde{\mathbf{V}}_m &= \mathbb{E}[\mathcal{T}(y_m) \mathbf{xx}^H], m = 1, \dots, M, \\ \tilde{\mathbf{T}} &= \mathbb{E}[\mathcal{T}(y) \mathcal{T}(y)^T], \end{aligned}$$

we can simplify the above expression into

$$\begin{aligned} & |\beta|^2 \sum_{m=1}^M \sum_{m'=1}^M \tilde{T}_{m,m'} |\mathbf{a}_m^H \mathbf{a}_{m'}|^2 + \mathbb{E}[\|\mathbf{xx}^H\|_F^2] \\ & - \beta^* \sum_{m=1}^M \text{tr}(\mathbf{a}_m \mathbf{a}_m^H \tilde{\mathbf{V}}_m) - \beta \sum_{m=1}^M \text{tr}(\tilde{\mathbf{V}}_m^H \mathbf{a}_m \mathbf{a}_m^H). \quad (24) \end{aligned}$$

We can now find the optimal parameter for  $\beta$  by taking the derivative with respect to  $\beta^*$  and setting the expression to zero. The resulting optimal scaling parameter is given by

$$\hat{\beta} = \frac{\sum_{m=1}^M \text{tr}(\mathbf{a}_m \mathbf{a}_m^H \tilde{\mathbf{V}}_m)}{\sum_{m=1}^M \sum_{m'=1}^M \tilde{T}_{m,m'} |\mathbf{a}_m^H \mathbf{a}_{m'}|^2}.$$

We now plug in  $\hat{\beta}$  into the expression (24), which yields

$$\begin{aligned} S-MSE_{SI} &= \left| \frac{\sum_{m=1}^M \text{tr}(\mathbf{a}_m \mathbf{a}_m^H \tilde{\mathbf{V}}_m)}{\sum_{m=1}^M \sum_{m'=1}^M \tilde{T}_{m,m'} |\mathbf{a}_m^H \mathbf{a}_{m'}|^2} \right|^2 \quad (25) \\ &\times \sum_{m=1}^M \sum_{m'=1}^M \tilde{T}_{m,m'} |\mathbf{a}_m^H \mathbf{a}_{m'}|^2 \\ &- \frac{\sum_{m=1}^M \text{tr}(\tilde{\mathbf{V}}_m^H \mathbf{a}_m \mathbf{a}_m^H)}{\sum_{m=1}^M \sum_{m'=1}^M \tilde{T}_{m,m'} |\mathbf{a}_m^H \mathbf{a}_{m'}|^2} \sum_{m=1}^M \text{tr}(\mathbf{a}_m \mathbf{a}_m^H \tilde{\mathbf{V}}_m) \\ &- \frac{\sum_{m=1}^M \text{tr}(\mathbf{a}_m \mathbf{a}_m^H \tilde{\mathbf{V}}_m)}{\sum_{m=1}^M \sum_{m'=1}^M \tilde{T}_{m,m'} |\mathbf{a}_m^H \mathbf{a}_{m'}|^2} \sum_{m=1}^M \text{tr}(\tilde{\mathbf{V}}_m^H \mathbf{a}_m \mathbf{a}_m^H) \\ &+ \mathbb{E}[\|\mathbf{xx}^H\|_F^2]. \end{aligned}$$

This expression can be simplified further to obtain:

$$\begin{aligned} S-MSE_{SI} &= \frac{\left| \sum_{m=1}^M \text{tr}(\mathbf{a}_m \mathbf{a}_m^H \tilde{\mathbf{V}}_m) \right|^2}{\sum_{m=1}^M \sum_{m'=1}^M \tilde{T}_{m,m'}^* |\mathbf{a}_m^H \mathbf{a}_{m'}|^2} \\ &- \frac{\left| \sum_{m=1}^M \text{tr}(\mathbf{a}_m \mathbf{a}_m^H \tilde{\mathbf{V}}_m) \right|^2}{\sum_{m=1}^M \sum_{m'=1}^M \tilde{T}_{m,m'} |\mathbf{a}_m^H \mathbf{a}_{m'}|^2} \\ &- \frac{\left| \sum_{m=1}^M \text{tr}(\mathbf{a}_m \mathbf{a}_m^H \tilde{\mathbf{V}}_m) \right|^2}{\sum_{m=1}^M \sum_{m'=1}^M \tilde{T}_{m,m'} |\mathbf{a}_m^H \mathbf{a}_{m'}|^2} \\ &+ \mathbb{E}[\|\mathbf{xx}^H\|_F^2], \\ &= R_{\mathbf{xx}^H} - \frac{\left| \sum_{m=1}^M \mathbf{a}_m^H \tilde{\mathbf{V}}_m \mathbf{a}_m \right|^2}{\sum_{m=1}^M \sum_{m'=1}^M \tilde{T}_{m,m'} |\mathbf{a}_m^H \mathbf{a}_{m'}|^2}, \end{aligned}$$

which is what we wanted to show in (12).

## E. Real-Valued Phase Retrieval

We now focus on the case where the signal vector  $\mathbf{x}$  to be recovered and the measurement matrix  $\mathbf{A}$  are both real-valued. We derive the LSPE by using the following assumptions, which are reasonable for phase retrieval problems.

**Assumptions 3.** Let  $\mathcal{H} = \mathbb{R}$ . Assume square measurements  $f(z) = z^2$  and the identity preprocessing function  $\mathcal{T}(y) = y$ . Assume that the signal vector  $\mathbf{x} \in \mathbb{R}^N$  is i.i.d. zero-mean Gaussian distributed with covariance matrix  $\mathbf{C}_{\mathbf{x}} = \sigma_x^2 \mathbf{I}_N$ , i.e.,  $\mathbf{x} \sim \mathcal{N}(\mathbf{0}_{N \times 1}, \sigma_x^2 \mathbf{I}_N)$ ; the parameter  $\sigma_x^2$  denotes the signal variance. Assume that the signal noise vector  $\mathbf{e}^z$  is zero-mean Gaussian with covariance matrix  $\mathbf{C}_{\mathbf{e}^z}$ , i.e.,  $\mathbf{e}^z \sim \mathcal{N}(\mathbf{0}_{M \times 1}, \mathbf{C}_{\mathbf{e}^z})$ , and the measurement noise vector  $\mathbf{e}^y$  is Gaussian with mean  $\bar{\mathbf{e}}^y$  and covariance matrix  $\mathbf{C}_{\mathbf{e}^y}$ , i.e.,  $\mathbf{e}^y \sim \mathcal{N}(\bar{\mathbf{e}}^y, \mathbf{C}_{\mathbf{e}^y})$ . Furthermore assume that  $\mathbf{x}$ ,  $\mathbf{e}^z$ , and  $\mathbf{e}^y$  are independent.

Under these assumptions, we can derive the following LSPE which we call LSPE- $\mathbb{R}$ ; the detailed derivations of this spectral estimator are given in Appendix F.

**Estimator 3 (LSPE- $\mathbb{R}$ ).** Let Assumptions 3 hold. Then, the spectral estimation matrix is given by

$$\mathbf{D}_{\mathbf{y}}^{\mathbb{R}} = \mathbf{K}_{\mathbf{x}} + \sum_{m=1}^M t_m \mathbf{V}_m, \quad (26)$$

where  $\mathbf{K}_{\mathbf{x}} = \sigma_x^2 \mathbf{I}_N$ , the vector  $\mathbf{t} \in \mathbb{R}^M$  is given by the solution to the linear system  $\mathbf{T}\mathbf{t} = \mathbf{y} - \bar{\mathbf{y}}$  with

$$\begin{aligned} \bar{\mathbf{y}} &= \text{diag}(\mathbf{C}_{\mathbf{z}}) + \bar{\mathbf{e}}^y \\ \mathbf{C}_{\mathbf{z}} &= \sigma_x^2 \mathbf{A}\mathbf{A}^T + \mathbf{C}_{\mathbf{e}^z} \\ \mathbf{T} &= 2\mathbf{C}_{\mathbf{z}} \odot \mathbf{C}_{\mathbf{z}} + \mathbf{C}_{\mathbf{e}^y} \end{aligned}$$

and  $\mathbf{V}_m = 2\sigma_x^4 \mathbf{a}_m \mathbf{a}_m^T$ ,  $m = 1, \dots, M$ . The spectral estimate  $\hat{\mathbf{x}}$  is given by the (scaled) leading eigenvector of  $\mathbf{D}_{\mathbf{y}}^{\mathbb{R}}$  in (26). Furthermore, the S-MSE is given by Theorem 2.

## F. Derivation of Estimator 3

We now use Theorem 1 to derive Estimator 3 under Assumptions 3. To this end, we require the three quantities:  $\bar{\mathcal{T}}(\mathbf{y})$ ,  $\mathbf{T}$ , and  $\mathbf{V}_m$ ,  $m = 1, \dots, M$ , which we derive separately.

**Computing  $\bar{\mathcal{T}}(\mathbf{y})$**  To compute the real-valued vector

$$\bar{\mathcal{T}}(\mathbf{y}) = \mathbb{E}[\mathcal{T}(\mathbf{y})], \quad (27)$$

we need the following result on the bivariate folded normal distribution developed in (Kan & Robotti, 2017, Sec. 3.1).

**Lemma 1.** Let  $[u_1, u_2] \sim \mathcal{N}(\boldsymbol{\mu}, \boldsymbol{\Sigma})$  be a pair of real-valued jointly Gaussian random variables with covariance matrix

$$\boldsymbol{\Sigma} = \begin{bmatrix} \sigma_1^2 & \sigma_{1,2}^2 \\ \sigma_{1,2}^2 & \sigma_2^2 \end{bmatrix}.$$

Then, for  $m = 1, 2$ , the pair of random variables  $(\nu_1, \nu_2)$  with  $\nu_1 = u_1^2$  and  $\nu_2 = u_2^2$  follows the bivariate folded normal distribution with the following (centered) moments:

$$\begin{aligned} \bar{\nu}_m &= \mathbb{E}[u_m^2] = \sigma_m^2 + \mu_m^2 \\ [\mathbf{C}_{\nu}]_{1,2} &= \mathbb{E}[(\nu_1 - \bar{\nu}_1)(\nu_2 - \bar{\nu}_2)] \\ &= 4\mu_1\mu_2\sigma_{1,2}^2 + 2\sigma_{1,2}^4 \\ [\mathbf{C}_{\nu}]_{1,1} &= \mathbb{E}[(\nu_1 - \bar{\nu}_1)^2] = 2\sigma_1^4 + 4\mu_1^2\sigma_1^2. \end{aligned}$$

Let  $\bar{\mathbf{z}} = \mathbb{E}[\mathbf{z}]$  denote the mean vector and  $\mathbf{C}_{\mathbf{z}} = \mathbf{A}\mathbf{C}_{\mathbf{x}}\mathbf{A}^H + \mathbf{C}_{\mathbf{e}^z} = \sigma_x^2 \mathbf{A}\mathbf{A}^H + \mathbf{C}_{\mathbf{e}^z}$  the covariance matrix of the ‘‘phased’’ measurements  $\mathbf{z} = \mathbf{A}\mathbf{x} + \mathbf{e}^z$ . Then, by defining  $\sigma_m^2 = [\mathbf{C}_{\mathbf{z}}]_{m,m}$ , we can compute the  $m$ th entry  $\bar{\mathcal{T}}(y_m)$  using Lemma 1 as follows:

$$\bar{\mathcal{T}}(y_m) = \bar{y}_m = \mathbb{E}[|z_m|^2 + n_m^y] = \sigma_m^2 + \bar{e}_m^y. \quad (28)$$

Hence, in compact vector notation we have

$$\bar{\mathcal{T}}(\mathbf{y}) = \bar{\mathbf{y}} = \text{diag}(\mathbf{C}_{\mathbf{z}}) + \bar{\mathbf{e}}^y. \quad (29)$$

**Computing  $\mathbf{T}$**  To compute the real-valued matrix

$$\begin{aligned} \mathbf{T} &= \mathbb{E}[(\mathcal{T}(\mathbf{y}) - \bar{\mathcal{T}}(\mathbf{y}))(\mathcal{T}(\mathbf{y}) - \bar{\mathcal{T}}(\mathbf{y}))^T] \\ &= \mathbb{E}[\mathcal{T}(\mathbf{y})\mathcal{T}(\mathbf{y})^T] - \bar{\mathcal{T}}(\mathbf{y})\bar{\mathcal{T}}(\mathbf{y})^T, \end{aligned} \quad (30)$$

we only need to compute the matrix  $\mathbb{E}[\mathcal{T}(\mathbf{y})\mathcal{T}(\mathbf{y})^T]$  as the vector  $\bar{\mathcal{T}}(\mathbf{y})$  was computed in (29). We compute this matrix entry-wise as

$$\begin{aligned} T_{m,m'} &= \mathbb{E}[(\mathcal{T}(y_m) - \bar{\mathcal{T}}(y_m))(\mathcal{T}(y_{m'}) - \bar{\mathcal{T}}(y_{m'}))] \\ &= \mathbb{E}[y_m y_{m'}^*] - \bar{y}_m \bar{y}_{m'}^* \\ &\stackrel{(a)}{=} \mathbb{E}[ (|z_m|^2 + e_m^y)(|z_{m'}|^2 + e_{m'}^y) ] \\ &\quad - (\sigma_m^2 + \bar{e}_m^y)(\sigma_{m'}^2 + \bar{e}_{m'}^y) \\ &= \mathbb{E}[|z_m|^2 |z_{m'}|^2] - \sigma_m^2 \sigma_{m'}^2 + [\mathbf{C}_{\mathbf{e}^y}]_{m,m'}, \end{aligned}$$

where (a) follows from (28). The only unknown term in the above expression is  $\mathbb{E}[|z_m|^2 |z_{m'}|^2]$ . This term is the second moment of the random vector  $[|z_m|^2, |z_{m'}|^2]$ , which follows a bivariate folded normal distribution. For  $m \neq m'$ , Lemma 1 yields

$$\mathbb{E}[|z_m|^2 |z_{m'}|^2] = \sigma_m^2 \sigma_{m'}^2 + 2\sigma_{m,m'}^4$$

with  $\sigma_{m,m'}^2 = [\mathbf{C}_{\mathbf{z}}]_{m,m'}$ . For  $m = m'$ , Lemma 1 yields

$$\mathbb{E}[|y_m|^2] = \mathbb{E}[|z_m|^4] = 3\sigma_m^4.$$

Hence, we have

$$T_{m,m'} = [\mathbf{C}_{\mathbf{e}^y}]_{m,m'} + \begin{cases} 2\sigma_{m,m'}^4 & \text{if } m \neq m' \\ 2\sigma_m^4 & \text{if } m = m', \end{cases}$$

which can be written in compact matrix form as

$$\mathbf{T} = 2\mathbf{C}_{\mathbf{z}} \odot \mathbf{C}_{\mathbf{z}} + \mathbf{C}_{\mathbf{e}^y}.$$

**Computing  $\mathbf{V}_m$**  To compute the matrices

$$\begin{aligned}\mathbf{V}_m &= \mathbb{E}[(\mathcal{T}(y_m) - \bar{\mathcal{T}}(y_m))(\mathbf{x}\mathbf{x}^H - \mathbf{K}_\mathbf{x})] \\ &= \mathbb{E}[\mathcal{T}(y_m)\mathbf{x}\mathbf{x}^H] - \bar{\mathcal{T}}(y_m)\mathbf{K}_\mathbf{x}\end{aligned}\quad (31)$$

for  $m = 1, \dots, M$ , we only need to compute the complex-valued matrix  $\mathbb{E}[\mathcal{T}(y_m)\mathbf{x}\mathbf{x}^H]$  as the two other quantities  $\mathbf{K}_\mathbf{x} = \mathbb{E}[\mathbf{x}\mathbf{x}^H]$  and  $\bar{\mathcal{T}}(y_m)$  are known. We compute this matrix entry-wise as

$$\begin{aligned}[\mathbf{V}_m]_{n,n'} &= \mathbb{E}[(\mathcal{T}(y_m) - \bar{\mathcal{T}}(y_m))x_n x_{n'}^*] \\ &= \mathbb{E}[y_m x_n x_{n'}^*] - \bar{y}_m [\mathbf{C}_\mathbf{x}]_{n,n'}.\end{aligned}$$

Since  $\bar{y}_m$  is known from (28), we focus on computing

$$\begin{aligned}&\mathbb{E}[y_m x_n x_{n'}^*] \\ &= \mathbb{E}\left[\left(\left(\sum_{j=1}^N A_{m,j}^* x_j^* + e_m^z\right) \times \left(\sum_{j'=1}^N A_{m,j'} x_{j'} + e_m^z\right) + e_m^y\right) x_n x_{n'}^*\right] \\ &= \mathbb{E}\left[\left(\sum_{j=1}^N A_{m,j}^* x_j^* \sum_{j'=1}^N A_{m,j'} x_{j'}\right) x_n x_{n'}^*\right] \\ &\quad + \mathbb{E}[e_m^z x_n x_{n'}^*] + \mathbb{E}[e_m^y x_n x_{n'}^*] \\ &= \sum_{j=1}^N A_{m,j}^* \sum_{j'=1}^N A_{m,j'} \mathbb{E}[x_j^* x_{j'} x_n x_{n'}^*] \\ &\quad + ([\mathbf{C}_{e^z}]_{m,m} + \bar{e}_m^y) [\mathbf{C}_\mathbf{x}]_{n,n'}.\end{aligned}\quad (32)$$

The only unknown in the above expression is the double summation in (32). Since we assumed that the entries of the signal vector  $\mathbf{x}$  are i.i.d., most of the terms in this summation are zero. For  $n \neq n'$ , there are only two nonzero terms, corresponding to the cases of  $(j, j') = (n, n')$  and  $(j, j') = (n', n)$ . Thus, for  $n \neq n'$  we have

$$\begin{aligned}&\sum_{j=1}^N A_{m,j}^* \sum_{j'=1}^N A_{m,j'} \mathbb{E}[x_j^* x_{j'} x_n x_{n'}^*] \\ &= 2A_{m,n}^* A_{m,n'} \mathbb{E}[|x_n|^2 |x_{n'}|^2] \\ &\stackrel{(b)}{=} 2A_{m,n}^* A_{m,n'} [\mathbf{C}_\mathbf{x}]_{n,n} [\mathbf{C}_\mathbf{x}]_{n',n'},\end{aligned}\quad (33)$$

where (b) follows from Lemma 1. For  $n = n'$ , we have

$$\begin{aligned}&\sum_{j=1}^N A_{m,j}^* \sum_{j'=1}^N A_{m,j'} \mathbb{E}[x_j^* x_{j'} x_n x_n^*] \\ &= |A_{m,n}|^2 \mathbb{E}[|x_n|^4] + \sum_{j \neq n, j'=1}^N |A_{m,j}|^2 \mathbb{E}[|x_j|^2 |x_n|^2] \\ &\stackrel{(c)}{=} 3|A_{m,n}|^2 [\mathbf{C}_\mathbf{x}]_{n,n}^2 + \sum_{j \neq n, j'=1}^N |A_{m,j}|^2 [\mathbf{C}_\mathbf{x}]_{j,j} [\mathbf{C}_\mathbf{x}]_{n,n}\end{aligned}$$

$$= 2|A_{m,n}|^2 [\mathbf{C}_\mathbf{x}]_{n,n}^2 + \sum_{j=1}^N |A_{m,j}|^2 [\mathbf{C}_\mathbf{x}]_{j,j} [\mathbf{C}_\mathbf{x}]_{n,n}.$$

As for (33), (c) follows from Lemma 1. By combining the above results, we have

$$\begin{aligned}\mathbf{V}_m &= 2\mathbf{C}_\mathbf{x}^H \mathbf{a}_m \mathbf{a}_m^H \mathbf{C}_\mathbf{x} + (\mathbf{a}_m^H \mathbf{C}_\mathbf{x} \mathbf{a}_m) (\mathbf{C}_\mathbf{x}^H \odot \mathbf{I}) \\ &\quad + ([\mathbf{C}_{e^z}]_{m,m} - \sigma_m^2) \mathbf{C}_\mathbf{x} = 2\sigma_x^4 \mathbf{a}_m \mathbf{a}_m^H,\end{aligned}$$

where  $\mathbf{a}_m^H$  denotes the  $m$ th row of the matrix  $\mathbf{A}$ .

## G. Derivation of Estimator 1

We now use Theorem 1 to derive Estimator 1 under Assumptions 1. To this end, we require the three quantities:  $\bar{\mathcal{T}}(\mathbf{y})$ ,  $\mathbf{T}$ , and  $\mathbf{V}_m$ ,  $m = 1, \dots, M$ , which we derive separately.

**Computing  $\bar{\mathcal{T}}(\mathbf{y})$**  To compute the real-valued vector  $\bar{\mathcal{T}}(\mathbf{y}) = \bar{\mathbf{y}}$  in (27), we need the following definitions. Let  $\bar{\mathbf{z}} = \mathbb{E}[\mathbf{z}]$  denote the mean vector and  $\mathbf{C}_\mathbf{z} = \mathbf{A}\mathbf{C}_\mathbf{x}\mathbf{A}^H + \mathbf{C}_{e^z} = \sigma_x^2 \mathbf{A}\mathbf{A}^H + \mathbf{C}_{e^z}$  the covariance matrix of the ‘‘phased’’ measurements  $\mathbf{z} = \mathbf{A}\mathbf{x} + e^z$ . Then, using Lemma 1 with the definitions  $\bar{\mathbf{z}}$  and  $\mathbf{C}_\mathbf{z}$ , we have

$$\begin{aligned}\bar{y}_m &= \mathbb{E}[|z_m|^2 + \bar{e}_m^y] = \mathbb{E}[|z_{m,\mathcal{R}}|^2 + |z_{m,\mathcal{I}}|^2 + \bar{e}_m^y] \\ &= \sigma_m^2 + \bar{e}_m^y,\end{aligned}\quad (34)$$

where we have used the definition  $\sigma_m^2 = [\mathbf{C}_\mathbf{z}]_{m,m}$ . Hence, in compact vector notation we have

$$\bar{\mathcal{T}}(\mathbf{y}) = \bar{\mathbf{y}} = \text{diag}(\mathbf{C}_\mathbf{z}) + \bar{\mathbf{e}}^y.$$

**Computing  $\mathbf{T}$**  To compute the real-valued matrix  $\mathbf{T}$  in (30), we will frequently use the following result. Since the vector  $\mathbf{z}$  is a complex circularly-symmetric jointly Gaussian vector, we can extract the covariance matrices of the real and imaginary parts separately as:

$$\mathbb{E}[\mathbf{z}_\mathcal{I}\mathbf{z}_\mathcal{I}^H] \stackrel{(a)}{=} \mathbb{E}[\mathbf{z}_\mathcal{R}\mathbf{z}_\mathcal{R}^H] = \frac{1}{2}\Re\{\mathbf{C}_\mathbf{z}\} = \frac{1}{2}\mathbf{C}_{\mathbf{z},\mathcal{R}}\quad (35)$$

$$\mathbb{E}[\mathbf{z}_\mathcal{R}\mathbf{z}_\mathcal{I}^H] = -\mathbb{E}[\mathbf{z}_\mathcal{I}\mathbf{z}_\mathcal{R}^H] = \frac{1}{2}\Im\{\mathbf{C}_\mathbf{z}\} = \frac{1}{2}\mathbf{C}_{\mathbf{z},\mathcal{I}},\quad (36)$$

where (a) follows from circular symmetry of the random vector  $\mathbf{x}$ . We are now ready to compute the individual entries of  $\mathbb{E}[\mathcal{T}(\mathbf{y})\mathcal{T}(\mathbf{y})^T]$  as

$$\begin{aligned}T_{m,m'} &= \mathbb{E}[(\mathcal{T}(y_m) - \bar{\mathcal{T}}(y_m))(\mathcal{T}(y_{m'}) - \bar{\mathcal{T}}(y_{m'}))] \\ &= \mathbb{E}[(y_m - \bar{y}_m)(y_{m'} - \bar{y}_{m'})^*] \\ &= \mathbb{E}[y_m y_{m'}^*] - \bar{y}_m \bar{y}_{m'}^*.\end{aligned}$$

The quantity  $\bar{y}_m$  is given by (34). Hence, we now compute

$$\mathbb{E}[y_m y_{m'}^*]$$

$$\begin{aligned}
 &= \mathbb{E}[(|z_m|^2 + e_m^y)(|z'_m|^2 + e_{m'}^y)^*] \\
 &= \mathbb{E}[(|z_{m,\mathcal{R}}|^2 + |z_{m,\mathcal{I}}|^2)(|z'_{m',\mathcal{R}}|^2 + |z'_{m',\mathcal{I}}|^2)] \\
 &\quad + [\mathbf{C}_{\mathbf{e}^y}]_{m,m} \\
 &= 2\mathbb{E}[|z_{m,\mathcal{R}}|^2|z'_{m',\mathcal{R}}|^2] + 2\mathbb{E}[|z_{m,\mathcal{R}}|^2|z'_{m',\mathcal{I}}|^2] \\
 &\quad + [\mathbf{C}_{\mathbf{e}^y}]_{m,m}.
 \end{aligned}$$

The first two terms above are a second moment of the variables  $[|z_{m,\mathcal{R}}|^2, |z'_{m',\mathcal{R}}|^2]$  and  $[|z_{m,\mathcal{R}}|^2, |z'_{m',\mathcal{I}}|^2]$ , which follow a bivariate folded normal distributions. We first focus on  $[|z_{m,\mathcal{R}}|^2, |z'_{m',\mathcal{R}}|^2]$ . With Lemma 1, we can calculate the moments using the covariance  $\mathbb{E}[\mathbf{z}_{\mathcal{R}}\mathbf{z}_{\mathcal{R}}^H]$  given in (35). To this end, define  $\sigma_{m,m',\mathcal{R}}^2 = [\mathbf{C}_{\mathbf{z},\mathcal{R}}]_{m,m'}$  and  $\sigma_{m,\mathcal{R}}^2 = [\mathbf{C}_{\mathbf{z},\mathcal{R}}]_{m,m}$ . Thus, we have

$$\mathbb{E}[|z_{m,\mathcal{R}}|^2|z'_{m',\mathcal{R}}|^2] = \begin{cases} \frac{\sigma_{m,\mathcal{R}}^2 \sigma_{m',\mathcal{R}}^2}{2} + \frac{\sigma_{m,m',\mathcal{R}}^4}{2}, & m \neq m' \\ 3\frac{\sigma_{m,\mathcal{R}}^4}{4}, & m = m'. \end{cases}$$

Analogously, we can compute  $\mathbb{E}[\mathbf{z}_{\mathcal{R}}\mathbf{z}_{\mathcal{I}}^H]$  in (36) from the covariance matrix of  $[|z_{m,\mathcal{R}}|^2, |z'_{m',\mathcal{I}}|^2]$ , with  $\sigma_{m,m',\mathcal{I}}^2 = [\mathbf{C}_{\mathbf{z},\mathcal{I}}]_{m,m'}$  and noting that  $\sigma_{m,\mathcal{I}}^2 = [\mathbf{C}_{\mathbf{z},\mathcal{I}}]_{m,m} = 0$  as

$$\mathbb{E}[|z_{m,\mathcal{R}}|^2|z'_{m',\mathcal{I}}|^2] = \begin{cases} \frac{\sigma_{m,\mathcal{R}}^2 \sigma_{m',\mathcal{I}}^2}{2} + 2\frac{\sigma_{m,m',\mathcal{I}}^4}{4}, & m \neq m' \\ 3\frac{\sigma_{m,\mathcal{R}}^4}{4}, & m = m'. \end{cases}$$

By combining the above results, we have

$$\begin{aligned}
 T_{m,m'} &= \begin{cases} \sigma_{m,\mathcal{R}}^2 \sigma_{m',\mathcal{R}}^2 + \sigma_{m,m',\mathcal{R}}^4 + \sigma_{m,m',\mathcal{I}}^4, & m \neq m' \\ 2\sigma_{m,\mathcal{R}}^4, & m = m', \end{cases} \\
 &\quad + [\mathbf{C}_{\mathbf{e}^y}]_{m,m'} - \bar{y}_m \bar{y}_{m'}^* \\
 &= [\mathbf{C}_{\mathbf{e}^y}]_{m,m'} + \begin{cases} \sigma_{m,m',\mathcal{R}}^4 + \sigma_{m,m',\mathcal{I}}^4, & m \neq m' \\ \sigma_{m,\mathcal{R}}^4, & m = m', \end{cases}
 \end{aligned}$$

which can be written in matrix form as

$$\mathbf{T} = \mathbf{C}_{\mathbf{z}} \odot \mathbf{C}_{\mathbf{z}}^* + \mathbf{C}_{\mathbf{e}^y}.$$

**Computing  $\mathbf{V}_m$**  To compute the matrices  $\mathbf{V}_m$ ,  $m = 1, \dots, M$ , in (31), we need the complex-valued matrix  $\mathbb{E}[\mathcal{T}(y_m)\mathbf{x}\mathbf{x}^H]$ . We compute this matrix entry-wise as

$$\begin{aligned}
 [\mathbf{V}_m]_{n,n'} &= \mathbb{E}[(\mathcal{T}(y_m) - \bar{\mathcal{T}}(y_m))x_n x_{n'}^*] \\
 &= \mathbb{E}[y_m x_n x_{n'}^*] - \bar{y}_m [\mathbf{C}_{\mathbf{x}}]_{n,n'}.
 \end{aligned}$$

Since  $\bar{y}_m$  is given by (34), we only need to compute

$$\begin{aligned}
 &\mathbb{E}[y_m x_n x_{n'}^*] \\
 &= \mathbb{E}\left[\left(\left(\sum_{j=1}^N A_{m,j}^* x_j^* + e_m^z\right) \times \left(\sum_{j'=1}^N A_{m,j'} x_{j'} + e_m^y\right)\right) x_n x_{n'}^*\right]
 \end{aligned}$$

$$\begin{aligned}
 &= \sum_{j=1}^N A_{m,j}^* \sum_{j'=1}^N A_{m,j'} \mathbb{E}[x_j^* x_{j'} x_n x_{n'}^*] \\
 &\quad + \mathbb{E}[|e_m^z|^2 x_n x_{n'}^*] + \mathbb{E}[e_m^y x_n x_{n'}^*] \\
 &= \sum_{j=1}^N A_{m,j}^* \sum_{j'=1}^N A_{m,j'} \mathbb{E}[x_j^* x_{j'} x_n x_{n'}^*] \\
 &\quad + ([\mathbf{C}_{\mathbf{e}^z}]_{m,m} + \bar{e}_m^y) [\mathbf{C}_{\mathbf{x}}]_{n,n'}. \tag{37}
 \end{aligned}$$

We will first simplify the term

$$\sum_{j=1}^N A_{m,j}^* \sum_{j'=1}^N A_{m,j'} \mathbb{E}[x_j^* x_{j'} x_n x_{n'}^*].$$

Since we assumed that the signal vector  $\mathbf{x}$  has i.i.d. zero-mean entries, most of the terms in this summation are zero. For  $n \neq n'$ , there is only one non-zero term for  $(j, j') = (n, n')$ . Thus, for  $n \neq n'$  we have

$$\begin{aligned}
 &\sum_{j=1}^N A_{m,j}^* \sum_{j'=1}^N A_{m,j'} \mathbb{E}[x_j^* x_{j'} x_n x_{n'}^*] \\
 &= A_{m,n}^* A_{m,n'} [\mathbf{C}_{\mathbf{x}}]_{n,n} [\mathbf{C}_{\mathbf{x}}]_{n',n'},
 \end{aligned}$$

since the term that corresponds to  $(j, j') = (n', n)$ , i.e.  $A_{m,n'}^* A_{m,n} \mathbb{E}[x_{n'}^* x_n^*] \mathbb{E}[x_n x_n]$ , is zero.

Next, for  $n = n'$ , we have

$$\begin{aligned}
 &\sum_{j=1}^N A_{m,j}^* \sum_{j'=1}^N A_{m,j'} \mathbb{E}[x_j^* x_{j'} x_n x_{n'}^*] \\
 &= |A_{m,n}|^2 \mathbb{E}[|x_n|^4] + \sum_{j \neq k, j=1}^N |A_{m,j}|^2 \mathbb{E}[|x_j|^2 |x_n|^2] \\
 &= |A_{m,n}|^2 \mathbb{E}[|x_{n,\mathcal{R}}|^4] + |A_{m,n}|^2 \mathbb{E}[|x_{n,\mathcal{I}}|^4] \\
 &\quad + 2|A_{m,n}|^2 \mathbb{E}[|x_{n,\mathcal{R}}|^2 |x_{n,\mathcal{I}}|^2] \\
 &\quad + \sum_{j \neq n, j=1}^N |A_{m,j}|^2 \\
 &\quad \times \mathbb{E}[(|x_{j,\mathcal{R}}|^2 + |x_{j,\mathcal{I}}|^2)(|x_{n,\mathcal{R}}|^2 + |x_{n,\mathcal{I}}|^2)] \\
 &\stackrel{(a)}{=} 2|A_{m,n}|^2 \mathbb{E}[|x_{n,\mathcal{R}}|^4] \\
 &\quad + 2 \sum_{j=1}^N |A_{m,j}|^2 \mathbb{E}[|x_{j,\mathcal{R}}|^2 |x_{n,\mathcal{I}}|^2] \\
 &\quad + 2 \sum_{j \neq n, j=1}^N |A_{m,j}|^2 \mathbb{E}[|x_{j,\mathcal{R}}|^2 |x_{n,\mathcal{R}}|^2] \\
 &\stackrel{(b)}{=} |A_{m,n}|^2 [\mathbf{C}_{\mathbf{x}}]_{n,n}^2 + \sum_{j=1}^N |A_{m,j}|^2 [\mathbf{C}_{\mathbf{x}}]_{j,j} [\mathbf{C}_{\mathbf{x}}]_{n,n},
 \end{aligned}$$

where (a) follows from circular symmetry of  $\mathbf{x}$  and (b) from Lemma 1. By combining the above results, we have

$$\mathbf{V}_m = \mathbf{C}_{\mathbf{x}}^H \mathbf{a}_m \mathbf{a}_m^H \mathbf{C}_{\mathbf{x}} + (\mathbf{a}_m^H \mathbf{C}_{\mathbf{x}} \mathbf{a}_m) (\mathbf{C}_{\mathbf{x}}^H \odot \mathbf{I})$$

$$+ ([\mathbf{C}_{\mathbf{e}^z}]_{m,m} - \sigma_m^2) \mathbf{C}_{\mathbf{x}} = \sigma_x^4 \mathbf{a}_m \mathbf{a}_m^H.$$

## H. Derivation of Estimator 2

We now use Theorem 1 to derive Estimator 2 under Assumptions 2. To this end, we require the three quantities:  $\bar{\mathcal{T}}(\mathbf{y})$ ,  $\mathbf{T}$ , and  $\mathbf{V}_m$ ,  $m = 1, \dots, M$ , which we derive separately.

**Computing  $\bar{\mathcal{T}}(\mathbf{y})$**  To derive an expression for  $\bar{\mathcal{T}}(\mathbf{y})$  in (27), we need the following two results.

**Lemma 2.** *Let  $\mathbf{u} \sim \mathcal{CN}(\mathbf{0}_{M \times 1}, \Sigma)$  be a complex-valued circularly-symmetric jointly Gaussian random vector with positive definite covariance matrix  $\Sigma \in \mathbb{C}^{M \times M}$ . Then, for the random variable  $\nu = \exp(-\mathbf{u}^H \mathbf{G} \mathbf{u})$  with positive definite  $\mathbf{G} \in \mathbb{C}^{M \times M}$  and  $\mathbf{G} + \Sigma^{-1}$  positive definite, we have the following result:*

$$\mathbb{E}[\nu] = \frac{1}{|\mathbf{G}\Sigma + \mathbf{I}_M|}.$$

*Proof.* We first expand the expected value into

$$\begin{aligned} \mathbb{E}[\nu] &= \mathbb{E}[\exp(-\mathbf{u}^H \mathbf{G} \mathbf{u})] = \\ &= \int_{\mathbb{C}^M} \exp(-\mathbf{u}^H \mathbf{G} \mathbf{u}) \frac{1}{\pi^M |\Sigma|} \exp(-\mathbf{u}^H \Sigma^{-1} \mathbf{u}) d\mathbf{u}, \end{aligned}$$

where  $|\Sigma| > 0$  is the determinant of  $\Sigma$ . We can now simplify the above expression as follows:

$$\begin{aligned} &= \int_{\mathbb{C}^M} \exp(-\mathbf{u}^H \mathbf{G} \mathbf{u}) \frac{1}{\pi^M |\Sigma|} \exp(-\mathbf{u}^H \Sigma^{-1} \mathbf{u}) d\mathbf{u} \\ &= \int_{\mathbb{C}^M} \frac{1}{\pi^M |\Sigma|} \exp(-\mathbf{u}^H (\mathbf{G} + \Sigma^{-1}) \mathbf{u}) d\mathbf{u} \\ &= \frac{\pi^M |(\mathbf{G} + \Sigma^{-1})^{-1}|}{\pi^M |\Sigma|} \frac{1}{\pi^M |(\mathbf{G} + \Sigma^{-1})^{-1}|} \\ &\quad \times \int_{\mathbb{C}^M} \exp(-\mathbf{u}^H (\mathbf{G} + \Sigma^{-1}) \mathbf{u}) d\mathbf{u} \\ &= \frac{|(\mathbf{G} + \Sigma^{-1})^{-1}|}{|\Sigma|} = \frac{1}{|\mathbf{G} + \Sigma^{-1}| |\Sigma|} = \frac{1}{|\mathbf{G}\Sigma + \mathbf{I}|}, \end{aligned}$$

where we also required that  $\mathbf{G} + \Sigma^{-1}$  is positive definite. ■

**Lemma 3.** *Let  $\mathbf{u} \sim \mathcal{N}(\bar{\mathbf{u}}, \Sigma)$  be a real-valued Gaussian random vector with mean  $\bar{\mathbf{u}}$  and covariance  $\Sigma$ , and  $\boldsymbol{\gamma} \in \mathbb{R}^N$  be a given vector. Then, we have*

$$\mathbb{E}[\exp(-\boldsymbol{\gamma}^T \mathbf{u})] = \exp(-\boldsymbol{\gamma}^T \bar{\mathbf{u}} + \frac{1}{2} \boldsymbol{\gamma}^T \Sigma \boldsymbol{\gamma}).$$

*Proof.* The proof is an immediate consequence of the moment generating function of a Gaussian random vector. ■

By considering Lemma 2 and Lemma 3 for scalar random variables, the  $m$ th entry of the preprocessed phaseless measurement is given by

$$\bar{\mathcal{T}}(y_m) = \mathbb{E}[\mathcal{T}(y_m)] = \mathbb{E}[\exp(-\gamma |z_m|^2 - \gamma [\mathbf{e}^y]_m)]$$

$$= \frac{1}{\gamma [\mathbf{C}_{\mathbf{z}}]_{m,m} + 1} \exp(-\gamma [\bar{\mathbf{e}}^y]_m + \frac{1}{2} \gamma^2 [\mathbf{C}_{\mathbf{e}^y}]_{m,m}).$$

We define the following auxiliary vectors

$$\mathbf{q}_\gamma = \gamma \text{diag}(\mathbf{C}_{\mathbf{z}}) + \mathbf{1}_{M \times 1} \quad (38)$$

$$\mathbf{p}_\gamma = \exp(-\gamma \bar{\mathbf{e}}^y + \frac{1}{2} \gamma^2 \text{diag}(\mathbf{C}_{\mathbf{e}^y})), \quad (39)$$

which enable us to rewrite the above expression in compact vector form as

$$\bar{\mathcal{T}}(\mathbf{y}) = \mathbf{p}_\gamma \odot \mathbf{q}_\gamma.$$

**Computing  $\mathbf{T}$**  To compute the matrix  $\mathbf{T}$  in (30), we only need to compute  $\mathbb{E}[\mathcal{T}(\mathbf{y}) \mathcal{T}(\mathbf{y})^T]$ , which we will compute entry-wise and in two separate steps. Concretely, we have

$$\begin{aligned} \mathbb{E}[\mathcal{T}(y_m) \mathcal{T}(y_{m'})^T] &= \mathbb{E}[\exp(-\gamma(|z_m|^2 + |z_{m'}|^2))] \\ &\quad \times \mathbb{E}[\exp(-\gamma([\mathbf{e}^y]_m + [\mathbf{e}^y]_{m'}))], \end{aligned}$$

where we compute both expected values separately. In the first step, we compute

$$\mathbb{E}[\exp(-\gamma(|z_m|^2 + |z_{m'}|^2))] = \mathbb{E}[\exp(-\mathbf{u}^H \mathbf{G} \mathbf{u})],$$

with  $\mathbf{u} = [z_m, z_{m'}]^T$  and  $\mathbf{G} = \mathbf{I}_2 \gamma$ . By invoking Lemma 2 with  $[\Sigma]_{m,m'} = [\mathbf{C}_{\mathbf{z}}]_{m,m'}$ , we obtain

$$\begin{aligned} \mathbb{E}[\exp(-\gamma(|z_m|^2 + |z_{m'}|^2))] &= \frac{1}{|\gamma \Sigma + \mathbf{I}_2|} \\ &= \frac{1}{(\gamma [\mathbf{C}_{\mathbf{z}}]_{m,m} + 1)(\gamma [\mathbf{C}_{\mathbf{z}}]_{m',m'} + 1) - \gamma^2 |[\mathbf{C}_{\mathbf{z}}]_{m,m'}|^2}. \end{aligned}$$

With the definition of  $\mathbf{q}_\gamma$  in (38), we can rewrite the above expression in vector form as

$$\begin{aligned} \mathbb{E}[\exp(-\gamma |z|^2) \exp(-\gamma |z|^2)^T] \\ = \mathbf{1}_{M \times M} \odot (\mathbf{q}_\gamma \mathbf{q}_\gamma^T - \gamma^2 \mathbf{C}_{\mathbf{z}} \odot \mathbf{C}_{\mathbf{z}}^*). \end{aligned}$$

In the second step, we compute

$$\mathbb{E}[\exp(-\gamma([\mathbf{e}^y]_m + [\mathbf{e}^y]_{m'}))] = \mathbb{E}[\exp(-\boldsymbol{\gamma}^T \mathbf{u})]$$

with  $\mathbf{u} = [[\mathbf{e}^y]_m, [\mathbf{e}^y]_{m'}]^T$  and  $\boldsymbol{\gamma}^T = [\gamma, \gamma]$ . By invoking Lemma 3 with mean  $\bar{\mathbf{u}} = [[\bar{\mathbf{e}}^y]_m, [\bar{\mathbf{e}}^y]_{m'}]$  and covariance  $\Sigma$  given by the entries of the covariance matrix  $\mathbf{C}_{\mathbf{e}^y}$  associated to the indices  $m$  and  $m'$ , we obtain

$$\begin{aligned} \mathbb{E}[\exp(-\gamma([\mathbf{e}^y]_m + [\mathbf{e}^y]_{m'}))] &= \exp(-\gamma([\bar{\mathbf{e}}^y]_m + [\bar{\mathbf{e}}^y]_{m'})) \\ &\quad \times \exp(\frac{1}{2} \gamma^2 ([\mathbf{C}_{\mathbf{e}^y}]_{m,m} + [\mathbf{C}_{\mathbf{e}^y}]_{m',m'} + 2[\mathbf{C}_{\mathbf{e}^y}]_{m,m'})). \end{aligned}$$

With the definition of  $\mathbf{p}_\gamma$  in (39), we can rewrite the above expression in vector form as

$$\mathbb{E}[\exp(-\gamma \mathbf{e}^y) \exp(-\gamma \mathbf{e}^y)^T] = (\mathbf{p}_\gamma \mathbf{p}_\gamma^T) \odot \exp(\gamma^2 \mathbf{C}_{\mathbf{e}^y})$$

We furthermore have

$$\bar{\mathcal{T}}(\mathbf{y}) \bar{\mathcal{T}}(\mathbf{y})^T = (\mathbf{p}_\gamma \mathbf{p}_\gamma^T) \odot (\mathbf{q}_\gamma \mathbf{q}_\gamma^T).$$

By combining the two steps with the above results, we have

$$\begin{aligned} \mathbf{T} &= (\mathbf{p}_\gamma \mathbf{p}_\gamma^T) \odot (\exp(\gamma^2 \mathbf{C}_{\mathbf{e}^y}) \odot (\mathbf{q}_\gamma \mathbf{q}_\gamma^T - \gamma^2 \mathbf{C}_{\mathbf{z}} \odot \mathbf{C}_{\mathbf{z}}^*) \\ &\quad - \mathbf{1}_{M \times M} \odot (\mathbf{q}_\gamma \mathbf{q}_\gamma^T)). \end{aligned}$$

**Computing  $\mathbf{V}_m$**  To compute the matrices  $\mathbf{V}_m$ ,  $m = 1, \dots, M$ , in (31), we only need  $\mathbb{E}[\mathcal{T}(y_m)\mathbf{x}\mathbf{x}^H]$  which we will compute entry-wise and in two steps. We have

$$\begin{aligned} \mathbb{E}[\mathcal{T}(y_m)x_n x_{n'}^*] &= \mathbb{E}[\exp(-\gamma|\mathbf{a}_m^H \mathbf{x} + [\mathbf{e}^z]_m|^2)x_n x_{n'}^*] \\ &\quad \times \mathbb{E}[\exp(-\gamma[\mathbf{e}^y]_m)], \end{aligned}$$

where we next compute both expected values separately. As a first step, we use direct integration to compute the following expected value:

$$\begin{aligned} \mathbb{E}[\exp(-\gamma|\mathbf{a}_m^H \mathbf{x} + [\mathbf{e}^z]_m|^2)x_n x_{n'}^*] &= \int_{\mathbb{C}^{N+1}} \exp(-\gamma|\mathbf{a}_m^H \mathbf{x} + [\mathbf{e}^z]_m|^2) \\ &\quad \times \frac{1}{(\pi\sigma_x^2)^N} \exp\left(-\frac{\|\mathbf{x}\|^2}{\sigma_x^2}\right) \\ &\quad \times \frac{1}{\pi\sigma_n^2} \exp\left(-\frac{|[\mathbf{e}^z]_m|^2}{\sigma_n^2}\right) x_n x_{n'}^* d\mathbf{x} d[\mathbf{e}^z]_m. \end{aligned}$$

We define the following auxiliary quantities:

$$\begin{aligned} \tilde{\mathbf{a}}_m^H &= [\mathbf{a}_m^H, 1] \\ \tilde{\mathbf{x}}^T &= [\mathbf{x}^T, [\mathbf{e}^z]_m] \\ \mathbf{C}_{\tilde{\mathbf{x}}} &= \begin{bmatrix} \sigma_x^2 \mathbf{I}_N & \mathbf{0}_{N \times 1} \\ \mathbf{0}_{1 \times N} & \sigma_m^2 \end{bmatrix} \\ \tilde{\mathbf{K}}^{-1} &= \gamma \tilde{\mathbf{a}}_m \tilde{\mathbf{a}}_m^H + \mathbf{C}_{\tilde{\mathbf{x}}}^{-1}, \end{aligned}$$

where  $\sigma_m^2 = \mathbb{E}[|[\mathbf{e}^z]_m|^2] = [\mathbf{C}_{\mathbf{z}}]_{m,m}$ . We now derive the above expectation in compact form as

$$\begin{aligned} \mathbb{E}[\exp(-\gamma|\tilde{\mathbf{a}}_m^H \tilde{\mathbf{x}}|^2) \tilde{x}_n \tilde{x}_{n'}^*] &= \\ &= \frac{1}{(\pi\sigma_x^2)^N} \frac{1}{\pi\sigma_n^2} \int_{\mathbb{C}^{N+1}} \exp(-\gamma|\tilde{\mathbf{a}}_m^H \tilde{\mathbf{x}}|^2 - \tilde{\mathbf{x}}^H \mathbf{C}_{\tilde{\mathbf{x}}}^{-1} \tilde{\mathbf{x}}) \tilde{x}_n \tilde{x}_{n'}^* d\tilde{\mathbf{x}} \\ &= \frac{1}{|\pi \mathbf{C}_{\tilde{\mathbf{x}}}|} \int_{\mathbb{C}^{N+1}} \exp(-\tilde{\mathbf{x}}^H (\gamma \tilde{\mathbf{a}}_m \tilde{\mathbf{a}}_m^H + \mathbf{C}_{\tilde{\mathbf{x}}}^{-1}) \tilde{\mathbf{x}}) \tilde{x}_n \tilde{x}_{n'}^* d\tilde{\mathbf{x}} \\ &= \frac{1}{|\pi \mathbf{C}_{\tilde{\mathbf{x}}}|} \int_{\mathbb{C}^{N+1}} \exp(-\tilde{\mathbf{x}}^H \tilde{\mathbf{K}}^{-1} \tilde{\mathbf{x}}) \tilde{x}_n \tilde{x}_{n'}^* d\tilde{\mathbf{x}}, \end{aligned}$$

where  $n = 1, \dots, N+1$ ,  $n' = 1, \dots, N+1$ . We can further rewrite this expression as

$$\begin{aligned} &\frac{1}{|\pi \mathbf{C}_{\tilde{\mathbf{x}}}|} \int_{\mathbb{C}^{N+1}} \exp(-\tilde{\mathbf{x}}^H \tilde{\mathbf{K}}^{-1} \tilde{\mathbf{x}}) \tilde{x}_n \tilde{x}_{n'}^* d\tilde{\mathbf{x}} \\ &= \frac{|\pi \tilde{\mathbf{K}}|}{|\pi \tilde{\mathbf{K}}| |\pi \mathbf{C}_{\tilde{\mathbf{x}}}|} \int_{\mathbb{C}^{N+1}} \exp(-\tilde{\mathbf{x}}^H \tilde{\mathbf{K}}^{-1} \tilde{\mathbf{x}}) \tilde{x}_n \tilde{x}_{n'}^* d\tilde{\mathbf{x}}. \end{aligned}$$

It is now key to realize that

$$\begin{aligned} &\frac{1}{|\pi \tilde{\mathbf{K}}|} \int_{\mathbb{C}^{N+1}} \exp(-\tilde{\mathbf{x}}^H \tilde{\mathbf{K}}^{-1} \tilde{\mathbf{x}}) \tilde{x}_n \tilde{x}_{n'}^* d\tilde{\mathbf{x}} \\ &= \mathbb{E}[\tilde{x}_n \tilde{x}_{n'}^*] = [\tilde{\mathbf{K}}]_{n,n'} \end{aligned}$$

and hence we have

$$\mathbb{E}[\exp(-\gamma|\tilde{\mathbf{a}}_m^H \tilde{\mathbf{x}}|^2) \tilde{x}_n \tilde{x}_{n'}^*]$$

$$\begin{aligned} &= \frac{|\tilde{\mathbf{K}}|}{|\mathbf{C}_{\tilde{\mathbf{x}}}|} [\tilde{\mathbf{K}}]_{n,n'} = \frac{1}{|\tilde{\mathbf{K}}^{-1}| |\mathbf{C}_{\tilde{\mathbf{x}}}|} [\tilde{\mathbf{K}}]_{n,n'} \\ &= \frac{1}{|\gamma \tilde{\mathbf{a}}_m \tilde{\mathbf{a}}_m^H + \mathbf{C}_{\tilde{\mathbf{x}}}^{-1}| |\mathbf{C}_{\tilde{\mathbf{x}}}|} [\tilde{\mathbf{K}}]_{n,n'} \\ &= \frac{1}{|\gamma \tilde{\mathbf{a}}_m \tilde{\mathbf{a}}_m^H \mathbf{C}_{\tilde{\mathbf{x}}} + \mathbf{I}_{N+1}|} [\tilde{\mathbf{K}}]_{n,n'}. \end{aligned}$$

We can now use the matrix-determinant lemma to simplify

$$\begin{aligned} |\gamma \tilde{\mathbf{a}}_m \tilde{\mathbf{a}}_m^H \mathbf{C}_{\tilde{\mathbf{x}}} + \mathbf{I}_{N+1}| &= \gamma \tilde{\mathbf{a}}_m^H \mathbf{C}_{\tilde{\mathbf{x}}} \tilde{\mathbf{a}}_m + 1 \\ &= \gamma(\sigma_x^2 \|\mathbf{a}_m\|^2 + \sigma_m^2) + 1 \end{aligned}$$

and the matrix inversion lemma to simplify

$$\begin{aligned} \tilde{\mathbf{K}} &= (\gamma \tilde{\mathbf{a}}_m \tilde{\mathbf{a}}_m^H + \mathbf{C}_{\tilde{\mathbf{x}}}^{-1})^{-1} \\ &= \mathbf{C}_{\tilde{\mathbf{x}}} - \frac{\gamma \mathbf{C}_{\tilde{\mathbf{x}}} \tilde{\mathbf{a}}_m \tilde{\mathbf{a}}_m^H \mathbf{C}_{\tilde{\mathbf{x}}}}{\gamma \tilde{\mathbf{a}}_m^H \mathbf{C}_{\tilde{\mathbf{x}}} \tilde{\mathbf{a}}_m + 1} \\ &= \mathbf{C}_{\tilde{\mathbf{x}}} - \frac{\gamma \mathbf{C}_{\tilde{\mathbf{x}}} \tilde{\mathbf{a}}_m \tilde{\mathbf{a}}_m^H \mathbf{C}_{\tilde{\mathbf{x}}}}{\gamma(\sigma_x^2 \|\mathbf{a}_m\|^2 + \sigma_m^2) + 1}. \end{aligned}$$

By using these two simplifications, we have

$$\begin{aligned} \mathbb{E}[\exp(-\gamma|\tilde{\mathbf{a}}_m^H \tilde{\mathbf{x}}|^2) \tilde{x}_n \tilde{x}_{n'}^*] &= \\ &= \frac{1}{\gamma(\sigma_x^2 \|\mathbf{a}_m\|^2 + \sigma_m^2) + 1} \\ &\quad \times \left[ \mathbf{C}_{\tilde{\mathbf{x}}} - \frac{\gamma \mathbf{C}_{\tilde{\mathbf{x}}} \tilde{\mathbf{a}}_m \tilde{\mathbf{a}}_m^H \mathbf{C}_{\tilde{\mathbf{x}}}}{\gamma(\sigma_x^2 \|\mathbf{a}_m\|^2 + \sigma_m^2) + 1} \right]_{n,n'} \end{aligned}$$

and since we are only interested in the upper  $N \times N$  part of the matrix  $\tilde{\mathbf{K}}$ , we have

$$\begin{aligned} \mathbb{E}[\exp(-\gamma|\mathbf{a}_m^H \mathbf{x} + [\mathbf{e}^z]_m|^2) x_n x_{n'}^*] &= \\ &= \frac{1}{\gamma(\sigma_x^2 \|\mathbf{a}_m\|^2 + \sigma_m^2) + 1} \\ &\quad \times \left[ \sigma_x^2 \mathbf{I}_N - \frac{\gamma \sigma_x^4 \mathbf{a}_m \mathbf{a}_m^H}{\gamma(\sigma_x^2 \|\mathbf{a}_m\|^2 + \sigma_m^2) + 1} \right]_{n,n'} \\ &= \frac{1}{\gamma[\mathbf{C}_{\mathbf{z}}]_{m,m} + 1} \left[ \sigma_x^2 \mathbf{I}_N - \frac{\gamma \sigma_x^4 \mathbf{a}_m \mathbf{a}_m^H}{\gamma[\mathbf{C}_{\mathbf{z}}]_{m,m} + 1} \right]_{n,n'} \end{aligned}$$

since for our assumptions

$$\sigma_x^2 \|\mathbf{a}_m\|^2 + \sigma_m^2 = [\mathbf{C}_{\mathbf{z}}]_{m,m}.$$

In compact matrix form, we have

$$\begin{aligned} \mathbb{E}[\exp(-\gamma|\mathbf{a}_m^H \mathbf{x} + [\mathbf{e}^z]_m|^2) \mathbf{x}\mathbf{x}^H] &= \\ &= \frac{1}{\gamma[\mathbf{C}_{\mathbf{z}}]_{m,m} + 1} \left( \sigma_x^2 \mathbf{I}_N - \frac{\gamma \sigma_x^4 \mathbf{a}_m \mathbf{a}_m^H}{\gamma[\mathbf{C}_{\mathbf{z}}]_{m,m} + 1} \right). \end{aligned}$$

As a second step, we use definition (39) and obtain

$$\mathbb{E}[\exp(-\gamma[\mathbf{e}^y]_m)] = [\mathbf{p}_\gamma]_m.$$

By combining both steps, we obtain

$$\mathbf{V}_m = \frac{[\mathbf{P}_\gamma]_m}{\gamma[\mathbf{C}_z]_{m,m} + 1} \left( \sigma_x^2 \mathbf{I}_N - \frac{\gamma \sigma_x^4 \mathbf{a}_m \mathbf{a}_m^H}{\gamma[\mathbf{C}_z]_{m,m} + 1} \right) - \frac{[\mathbf{P}_\gamma]_m}{\gamma[\mathbf{C}_z]_{m,m} + 1} \sigma_x^2 \mathbf{I}_N$$

$$= -\frac{\gamma \sigma_x^4 [\mathbf{P}_\gamma]_m}{(\gamma[\mathbf{C}_z]_{m,m} + 1)^2} \mathbf{a}_m \mathbf{a}_m^H,$$

which is what we desperately wanted to show.
